# Supplementary material
Source: PubMed Central journal article supplement (PMC2772717)
Supplement: supp_83_22_11514__1.pdf [file supp_83_22_11514__1.pdf]

**Supplemental Table 1. MHC class I alleles expressed by twenty SIV-infected Indian rhesus macaques included in this study.** The full complement of MHC class I alleles expressed by SIVmac239 (WT)-infected (part A) and 8X-infected (part B) macaques was determined. RNA was isolated from animals' PBMC, converted to cDNA, amplified with primers specific for a variable region of macaque MHC class I genes, and pyrosequenced as described previously (54). The table shows transcript levels as a fraction of the total MHC class I sequence reads for each animal. Transcripts making up 1-5% of reads are colored light orange, 5-30% darker orange, and greater than 30%, red. We report only the alleles that were scored positive in this table. We had previously excluded *Mamu-B\*17+* macaques from this study by PCR-SSP (26). Transcript levels greater than 30% of total reads are consistent with homozygosity at a locus. Set-point viral load status is indicated beneath the animal's identification number. (P) indicates animals with viral loads >20,000 vRNA copy eq/ml plasma, (C) indicates animals with viral loads <20,000 vRNA copy eq/ml plasma, and (EC) indicates animals with viral loads <1,000 vRNA copy eq/ml plasma. *Mamu-B\*08* is highlighted in blue in the list of alleles.



| Animal ID                     |
|-------------------------------|
| Viral load status             |
| A1*00101;A1*00102             |
| A1*00201                      |
| A1*003g                       |
| A1*004g                       |
| A1*00602                      |
| A1*00701/03/05/06             |
| A1*00801;A1*00801like         |
| A1*01101/02/03/04             |
| A1*019g                       |
| A1*0250202                    |
| A1*02601/0102/01like          |
| A1*02801;AG*02011             |
| A2*0501/0202/09/16/27         |
| A2*05g                        |
| A2*2401                       |
| A3*1301/02/04/06/07;A4*1406   |
| A3*1303/11                    |
| A3*1305/10/10like;A4*0301/02  |
| A4*0204                       |
| A4*140301/01like2/0302/405/09 |
| A6*0101/02/03/04/04like       |
| A7*0106                       |
| Mm-A* nov006                  |
| Mm-A* nov030                  |

|                           |
|---------------------------|
| B*0010101                 |
| B*00501/02                |
| B*00601/02                |
| B*00702/03                |
| <b>B*00801</b>            |
| B*01201                   |
| B*01901/03                |
| B*02001;B*06803           |
| B*02101/03                |
| B*02201                   |
| B*02801                   |
| B*03001/0301/0302/0303/04 |
| B*03002/05                |
| B*03101/02                |
| B*03501;B*04901           |
| B*03801(primer mismatch)  |
| B*04001/02                |
| B*044g                    |
| B*04503                   |
| B*0460101/0202/09/15      |
| B*0460102/0103/0201/08    |
| B*04701;B*047like         |
| B*04702;B*04704;B*07101   |
| B*05102                   |
| B*05104                   |
| B*05302                   |
| B*05701                   |
| B*02601;B*05702           |
| B*06001                   |
| B*06002                   |
| B*06003                   |
| B*0680102/02/05           |
| B*07001                   |
| B*07201/02                |
| B*07401/02/02-V1          |
| B*07902                   |
| B*07904                   |
| B*08001                   |
| B*08101/02                |
| B*08201                   |
| B*08202                   |
| B*08301                   |
| B*09201                   |
| B*09601                   |
| Mm-B* nov001              |
| Mm-B* nov002              |
| Mm-B* nov005              |
| Mm-B* nov007              |
| Mm-B* nov012              |
| Mm-B* nov017              |
| Mm-B* nov020              |
| Mm-B* nov021              |
| Mm-B* nov023              |
| Mm-B* nov038              |
| Mm-B* nov039              |
| Mm-B* nov040              |
| Mm-B* nov074              |
| I'g                       |

|                          |
|--------------------------|
| E*01g;E*07g              |
| E*0104;E*06              |
| E*0112                   |
| E*0113                   |
| E*02                     |
| E*0201                   |
| E*030101;E*08            |
| E*0901                   |
| Mm-E* nov006             |
| Mm-E* nov007             |
| Mm-E* nov013             |
| F*0102;F*0104;F*0104like |
| F*0103;F*0105            |

| r98030 | rh2258 | r02120 | r96009 | r03028 | r97072 | r03035 | r04072 | r01088 | r04135 |
|--------|--------|--------|--------|--------|--------|--------|--------|--------|--------|
| P      | P      | P      | P      | P      | P      | P      | P      | EC     | EC     |
|        |        |        |        |        | 13.4   |        |        | 31.3   | 15.0   |
|        | 30.6   | 17.8   |        | 17.7   |        |        |        |        | 0.2    |
|        |        |        | 30.0   | 11.6   | 14.6   | 15.0   | 16.1   |        |        |
| 18.4   |        |        |        |        |        |        | 13.3   |        |        |
|        |        |        |        |        |        | 4.8    |        |        |        |
| 11.7   |        |        |        |        |        |        |        |        |        |
|        |        | 13.5   |        |        |        |        |        |        |        |
| 2.0    |        |        |        |        | 0.2    |        | 0.2    |        |        |
| 1.6    |        |        |        |        |        | 2.7    |        |        |        |
|        |        |        |        |        |        |        |        | 0.2    | 8.2    |
|        | 3.0    | 2.0    |        | 2.5    |        |        |        |        | 2.9    |
|        |        |        |        |        |        |        |        |        | 2.4    |
| 1.7    | 1.4    | 2.2    | 6.6    | 2.5    | 3.2    | 1.5    | 4.4    |        |        |
| 0.4    |        |        |        |        |        | 0.8    |        |        |        |
|        |        | 0.3    | 0.2    | 0.2    |        |        | 0.5    |        |        |

|      |      |      |      |      |      |      |      |      |      |
|------|------|------|------|------|------|------|------|------|------|
|      |      | 9.5  |      |      |      |      |      |      |      |
| 9.4  | 4.3  | 4.6  | 4.6  | 4.1  | 4.4  | 4.0  | 6.0  | 4.5  | 2.8  |
|      |      | 10.3 |      |      |      |      |      |      |      |
| 30.9 | 19.1 | 13.4 | 17.4 | 15.8 | 18.3 | 13.7 | 20.9 | 12.4 | 13.1 |
|      | 8.1  |      | 6.0  | 5.8  | 6.2  | 7.8  | 6.8  | 5.1  |      |
|      |      |      |      |      |      |      |      |      | 2.8  |
|      |      |      | 4.3  |      | 3.6  | 5.2  | 4.9  | 4.7  | 4.6  |
|      |      |      |      |      |      |      |      |      | 12.3 |
|      | 2.4  |      | 3.5  | 2.3  | 2.4  | 1.4  | 3.0  | 3.7  |      |
|      |      | 2.4  |      |      |      |      |      |      |      |
|      |      |      | 2.5  |      | 2.4  |      | 3.8  | 2.5  |      |
|      |      |      |      |      | 0.2  | 0.2  |      | 0.1  |      |
|      | 0.3  |      |      | 5.0  |      |      |      |      |      |
|      |      |      |      |      |      |      |      |      | 0.8  |
|      | 0.3  |      |      | 0.4  |      | 1.6  |      |      |      |
|      |      |      |      |      |      |      |      |      | 0.2  |
| 0.2  | 0.3  | 0.2  | 1.1  | 0.4  | 0.4  | 0.3  |      | 0.4  | 0.2  |
| 0.4  |      |      | 0.7  | 1.2  | 0.5  | 1.2  | 0.8  | 0.4  |      |
|      | 0.3  |      | 2.2  | 2.7  | 2.1  | 2.3  | 4.1  | 1.5  |      |
|      | 1.3  |      |      |      |      |      |      |      |      |
|      |      |      |      |      |      |      |      |      | 0.2  |
|      | 0.8  |      |      | 0.2  | 0.2  | 0.5  |      | 0.1  |      |
| 3.8  | 4.9  | 4.0  | 1.4  | 3.8  | 3.0  | 4.2  | 2.5  | 0.7  | 2.2  |
|      | 4.3  |      | 5.9  | 4.3  | 5.3  | 11.6 |      | 4.0  |      |
| 1.8  | 0.5  | 0.6  |      |      | 1.7  | 2.5  |      | 2.4  | 1.4  |
|      |      |      |      |      |      |      |      |      |      |
|      |      |      |      |      |      |      |      |      | 1.7  |
|      | 3.9  |      |      | 3.2  |      |      |      |      |      |
|      |      |      |      |      |      |      |      |      |      |
|      |      | 0.2  |      | 0.2  |      |      |      |      |      |
|      |      | 0.2  |      | 0.2  |      |      | 0.2  |      |      |
|      |      | 0.3  |      |      |      |      |      | 0.4  |      |
|      | 1.1  |      | 0.6  | 0.5  | 0.6  | 1.0  |      |      |      |
|      |      |      |      |      |      |      |      |      | 1.4  |
|      |      |      |      |      |      |      |      |      | 5.1  |
|      |      |      |      |      |      |      |      |      | 4.9  |
|      |      |      | 0.6  |      | 0.2  |      | 0.2  | 0.1  |      |
| 0.3  | 0.8  | 1.5  | 1.5  | 1.1  | 0.5  | 0.7  | 1.0  | 1.0  | 0.8  |

|      |     |     |     |     |     |     |     |      |      |
|------|-----|-----|-----|-----|-----|-----|-----|------|------|
| 16.1 | 6.0 | 8.0 |     |     | 6.8 | 7.7 | 7.3 | 23.4 | 10.3 |
|      | 5.2 | 8.3 | 8.4 | 8.0 | 8.5 | 8.6 |     |      |      |
|      | 0.3 | 0.7 | 0.3 | 1.0 | 0.5 | 0.5 |     |      |      |
|      |     |     | 2.1 | 5.0 |     |     | 3.5 |      | 6.3  |
|      | 0.8 |     |     |     | 0.4 |     |     | 0.6  | 0.5  |
|      |     |     |     |     |     |     |     |      |      |
| 0.6  |     |     |     |     |     |     |     |      |      |
|      |     |     |     |     |     |     | 0.4 | 0.3  |      |
| 0.7  |     |     |     |     | 0.2 |     |     |      |      |

| r96141 | rh2029 |
|--------|--------|
| EC     | P      |
| 17.3   | 12.9   |
|        |        |
|        | 10.8   |
| 12.3   |        |
|        |        |
| 0.6    | 0.7    |
|        |        |
|        | 3.4    |
| 0.9    |        |

|      |      |
|------|------|
| 2.9  |      |
|      |      |
| 8.8  |      |
|      | 6.4  |
| 6.4  |      |
|      | 19.5 |
| 4.7  |      |
|      |      |
| 1.2  |      |
|      | 8.6  |
|      | 10.2 |
|      |      |
| 12.7 |      |
| 0.5  | 0.3  |
| 0.9  |      |
| 4.3  |      |
|      | 2.2  |
|      | 5.0  |
|      |      |
|      | 2.6  |
|      |      |
|      | 0.7  |
|      |      |
| 5.4  |      |
|      |      |
| 0.3  |      |
| 0.3  |      |
|      |      |
|      | 2.0  |
|      |      |
|      | 1.4  |
|      | 5.1  |
|      | 4.9  |
|      |      |
| 2.1  | 1.2  |

|      |      |
|------|------|
|      | 13.5 |
| 0.5  |      |
|      |      |
| 6.1  |      |
|      |      |
| 11.7 |      |
|      |      |
|      |      |
|      | 0.2  |

1B.  
8X-  
infected  
animals
