# Supplementary material
Source: PubMed Central journal article supplement (PMC2772717)
Supplement: supp_83_22_11514__3.pdf [file supp_83_22_11514__3.pdf]

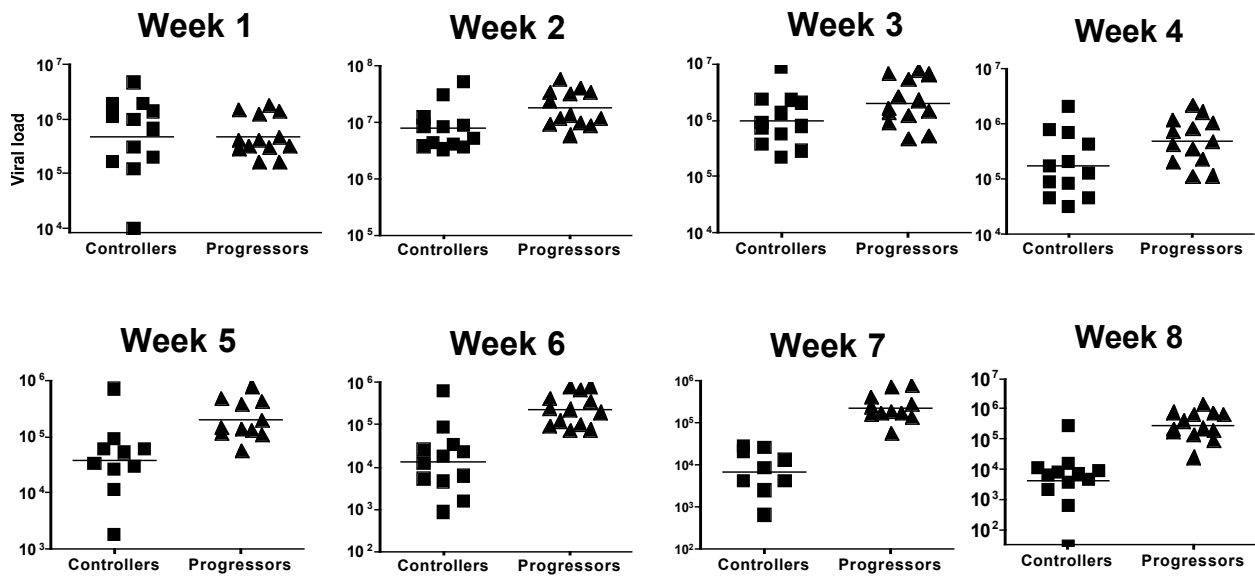

**Supplemental Figure 2. Divergence of controllers' and progressors' viral loads.** The ten 8X- and fifteen WT-infected *Mamu-B\*08+* macaques in this study were determined to be controllers or progressors based on their set-point viral loads (see Figure 5). Acute phase viral loads for these animals are plotted here, segregated based on whether an animal went on to be a controller or progressor. Viral loads from several of the WT-infected animals (r01064, r98057, r96104, r96113, and r00078) were unavailable at week 5 and/or week 7 post-infection, so fewer data points are present on those graphs.
