# Supplementary material
Source: PubMed Central journal article supplement (PMC2772717)
Supplement: supp_83_22_11514__6.pdf [file supp_83_22_11514__6.pdf]

## A. Elispot reactivity in 8X animals

- RRLTARGLL –defined Nef RL9b epitope, negative
- RRLTARGLP –8X variant of epitope, negative
- VRRRLTARGLL –positive
- VRRRLTARGL –positive
- RRRLTARGL –folded as tetramer, Nef RL9c

## B. Dual tetramer stain of an animal making both responses

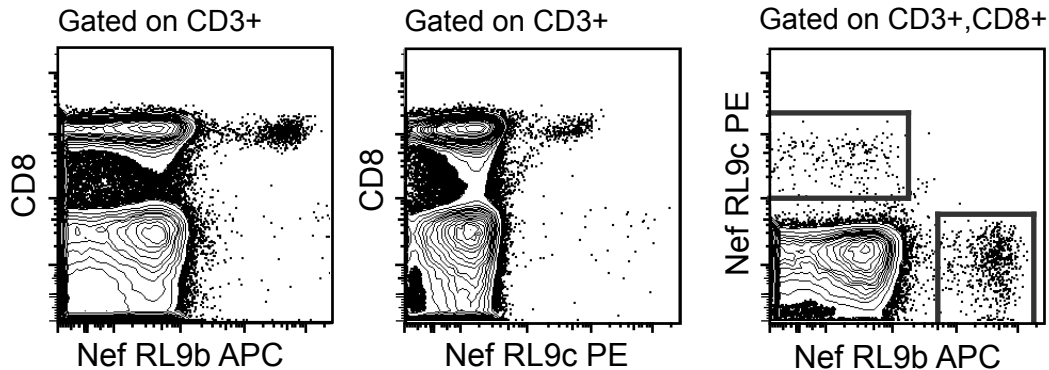

## C. Tetramer responses in WT- and 8X-infected macaques

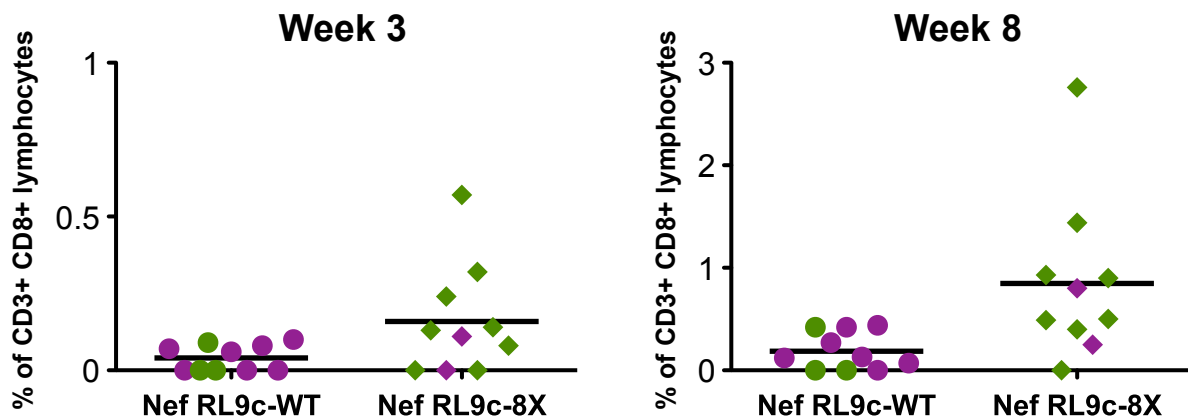

**Supplemental Figure 5. Discovery of a novel Mamu-B\*08-restricted epitope.** A) Reactivity to a defined Mamu-B\*08 minimal epitope or its 8X-variant was not typically observed in 8X-infected *Mamu-B\*08+* macaques. Nine of ten animals responded to a pool containing an N-terminal extension of this peptide, and a tetramer was folded with the positive peptide with the highest Mamu-B\*08 binding affinity. This 9-mer peptide overlaps with the previously defined Nef<sub>246-254</sub>RL9b epitope by eight amino acids. B) Tetramer staining in an 8X-infected animal responding to both the Nef<sub>246-254</sub>RL9b and Nef<sub>245-253</sub>RL9c epitopes. Nef<sub>246-254</sub>RL9b and Nef<sub>245-253</sub>RL9c tetramers did not stain the same cells. C) Nef<sub>245-253</sub>RL9c tetramer stain frequency in SIVmac239-WT and 8X-infected animals at three and eight weeks post-infection.
